# Supplementary material for: Engineering bimetal Cu, Co sites on 3D N-doped porous carbon nanosheets for enhanced oxygen reduction electrocatalysis
Source: Royal Society of Chemistry journal article supplement (doi:10.1039/d0cc03977b), 2020-01-01
Supplement: d0cc03977b1.pdf [file d0cc03977b1.pdf]

## Electronic Supplementary Information (ESI) for

# Engineering bimetal Cu, Co sites on 3D N-doped porous carbon nanosheets for enhanced oxygen reduction electrocatalysis

Linzhi Lu,<sup>‡a</sup> Ying Liu,<sup>‡a</sup> Jiayao Fan,<sup>a</sup> Lei Wang,<sup>a</sup> Yue Lin,<sup>\*b</sup> Dongdong Xu,<sup>a</sup> Zhihui Dai,<sup>a</sup> and Min Han<sup>\*ac</sup>

<sup>a</sup> Jiangsu Key Laboratory of New Power Batteries, and Jiangsu Key Laboratory of Biofunctional Materials, School of Chemistry and Materials Science, Nanjing Normal University, Nanjing 210023, P. R. China.

**E-mail:** [07203@njnu.edu.cn](mailto:07203@njnu.edu.cn)

<sup>b</sup> Hefei National Laboratory for Physical Sciences at the Microscale, University of Science & Technology of China, Hefei 230026, P. R. China.

**E-mail:** [linyue@ustc.edu.cn](mailto:linyue@ustc.edu.cn)

<sup>c</sup> State Key Laboratory of Coordination Chemistry, Nanjing National Laboratory of Solid State Microstructures, Nanjing University, Nanjing 210093, P. R. China

<sup>‡</sup> L. Lu and Y. Liu contributed equally

## Experimental Sections

*Materials and Reagents:* All the chemical reagents were obtained from available commercial sources without further purification. The  $C_{12}H_{25}SO_3Na$  (SDS),  $K_2S_2O_8$  ( $\geq 99.5\%$ ), melamine ( $\geq 99.0\%$ ) and styrene ( $\geq 99.0\%$ ) were obtained from Alfa Aesar. And the  $H_2SO_4$  (95.0%~98.0%),  $CoCl_2 \cdot 6H_2O$  ( $\geq 99.0\%$ ), and  $CuCl_2 \cdot 2H_2O$  ( $\geq 99.0\%$ ) were obtained from the Sinopharm Chemical Reagent Co. Ltd. (Shanghai).

*Synthesis of polystyrene (PS) spheres:* In a typical synthesis, SDS (151.2 mg) and  $K_2S_2O_8$  (200.0 mg) were firstly dissolved in a mixture of deionized water (117 mL) and ethanol (23 mL) under stirring in  $N_2$ -saturated atmosphere. After maintained at 70 °C for 30 min, 7 mL of styrene (dispersed in 2M NaOH) were added dropwise. The obtained solution was kept stirring for another 6 h. Finally, the product was separated by centrifugation, and washed with water and ethanol for several times to remove the by-products. After freeze-drying for 4h, the PS spheres were obtained, and employed for the subsequent sulfonation reaction.

*Synthesis of sulfoacid-functionalized polystyrene (SPS) spheres:* The pre-synthesized PS spheres (1000 mg) were firstly dispersed in 15 mL of deionized water by ultrasonication for 10 min. Whereafter, 50 mL of concentrated  $H_2SO_4$  were dropwise added into reaction system with continuously stirring to trigger the sulfonation reaction. After reacted for 24 h, the product was centrifuged and washed with deionized water for several times until the pH close to neutral. Finally, the SPS powder was obtained by freeze-drying overnight.

*Synthesis of Cu,Co-N-C NSs:* In a typical procedure, the pre-synthesized SPS spheres (0.3 g) were dispersed in 150 mL of deionized water under mechanical stirring to form a uniform suspension. Then, the  $CuCl_2 \cdot 2H_2O$  (0.75 g),  $CoCl_2 \cdot 6H_2O$  (1.05 g) and melamine (5.40 g) were added into the above suspension in turn. After continuously stirring at room temperature for 4 h, the desired precursors were obtained by centrifugation and then subjected to freeze-drying for 5 h. Subsequently, the obtained precursors were loaded into a clean ceramic boat, and placed in the central region of a horizontal tube furnace. By introducing Ar gas to expel the air for 30 min, the furnace was heated from room

temperature to 900 °C with a heating rate of 5 °C min<sup>-1</sup>, and maintained at 900 °C for 1 h. After naturally cooled down to room temperature, the black crude product was obtained, which was further soaked in 0.5 M H<sub>2</sub>SO<sub>4</sub> for 10 h and then re-annealed under Ar atmosphere at 900 °C for another 1 h to obtain the desired Cu,Co-N-C NSs.

*Synthesis of Cu-N-C and Co-N-C counterparts:* The synthetic process of Cu-N-C and Co-N-C counterparts were similar to that for Cu,Co-N-C NSs. The only difference lies on the used precursors that without adding CoCl<sub>2</sub>·6H<sub>2</sub>O and CuCl<sub>2</sub>·2H<sub>2</sub>O, respectively.

*Materials characterization:* The field-emission scanning electron microscopy (FE-SEM) images were acquired on a JSM-7600F apparatus. And the transmission electron microscopy (TEM) and high angle annular dark field-scanning transmission electron microscopy (HAADF-STEM) images as well as elemental mapping patterns were obtained on JEOL-2100F and probe aberration-corrected JEM ARM 200F apparatuses, respectively. The XRD patterns were collected on a D/max 2500 VL/PC diffractometer (Japan) that equipped with graphite monochromatized Cu K $\alpha$  radiation ( $\lambda = 1.54060 \text{ \AA}$ ). And the induction coupled plasma atomic emission spectra tests (ICP) were executed on a Jarrel-Ash 1100+2000 Quantometer. The Raman spectra were recorded on a JY HR 800 (France) instrument with an optical multichannel spectrometer Microdil 28 (Dilor) equipped with a microscope. An objective with 100 $\times$  magnification was employed both for focusing the excitation light (Ar<sup>+</sup> laser, 488 nm) and for collecting the scattered light. The N<sub>2</sub> sorption tests were performed on a Quantachrome Instruments Autosorb AS-6B. The Fourier-transformed infrared (FT-IR) spectra were obtained on a Vertex-70 spectrometer (Bruker). And the X-ray photoelectron spectroscopy (XPS) tests were carried out on a scanning X-ray microprobe (PHI 5000 Versa, ULACPHI, Inc.) with Al K $\alpha$  radiation. As for electrochemical impedance spectroscopy (EIS) tests, they were performed on a CHI 660E electrochemical workstation under the actual ORR conditions at 298 K. The applied potentials were fixed at -0.15 V (vs. Ag/AgCl). All the EIS data were recorded at the frequency of 10<sup>-1</sup>-10<sup>6</sup> Hz.

*Electrocatalytic measurements:* The electrocatalytic experiments were carried out on a Garmy's rotating ring-disk electrode (RRDE) that equipped with a CHI 700e electrochemical workstation. The diameter of the glassy-carbon disk in RRDE is approximately 5 mm. A standard three-electrode system

was adopted for all the tests. The Cu,Co-N-C NSs or other control catalysts modified RRDE were served as the working electrodes, and the Ag/AgCl and high-purity graphite rod or Pt foil were used as the reference electrode and counter electrode, respectively. For each test, the total loading amount of catalyst was fixed to be 0.204 mg cm<sup>-2</sup>. The electrocatalytic ORR experiments were executed by firstly bubbling the electrolyte solution (0.1 M KOH) with high purity O<sub>2</sub> for 20 min, and then blanketing the solution with an O<sub>2</sub> atmosphere during the entire experiment. The linear sweep voltammogram (LSV) plots were recorded from -0.8 to 0.2 V (vs. Ag/AgCl) under different electrode rotating rates with the scan rate of 5 mV/s. All the LSV plots were recorded as measured that without IR correction. The number of transferred electrons (*n*) during the ORR process was firstly calculated according to the following Koutecky-Levich (K-L) equation:

$$\frac{1}{J} = \frac{1}{J_k} + \frac{1}{J_L} = \frac{1}{J_k} + \frac{1}{B\omega^{0.5}} \quad (1)$$

$$B = 0.62nF(D_{O_2})^{2/3}\nu^{-1/6}C_{O_2} \quad (2)$$

In the equation (1), the *J* is the measured current density, *J<sub>k</sub>* is the kinetic current density, and  $\omega$  is the rotating rate of the electrode. As for the equation (2), the *n* represents the number of transferred electrons during the ORR process, *F* is the Faraday constant (96500 C mol<sup>-1</sup>), *D<sub>O<sub>2</sub></sub>* is the diffusion coefficient of O<sub>2</sub> in the electrolyte (1.9 × 10<sup>-5</sup> cm<sup>2</sup> s<sup>-1</sup>), *ν* is the kinetic viscosity (0.01 cm<sup>2</sup> s<sup>-1</sup>), and *C<sub>O<sub>2</sub></sub>* is the saturated concentration of O<sub>2</sub> (1.2 × 10<sup>-6</sup> mol cm<sup>-3</sup>).

Moreover, the *n* value and the yield of formed intermediate peroxide (HO<sub>2</sub><sup>-</sup>) species were further calculated according to the RRDE method *via* the following equations:

$$n = 4 I_d / (I_d + I_r/N) \quad (3)$$

$$HO_2^- \% = 200 (I_r/N)/(I_d + I_r/N) \quad (4)$$

Where the *I<sub>d</sub>* represents the disk current, *I<sub>r</sub>* stands for the ring current, and *N* is the collection efficiency of the RRDE apparatus. Here, the *N* value is 0.37, as determined from the redox system that contains Fe<sup>II</sup>/Fe<sup>III</sup> ions.

For comparison, all potential values used in this study were normalized to that of the reversible hydrogen electrode (RHE) based on the formula: *E* (RHE) = *E* (Ag/AgCl) + 0.197 + 0.0591\*pH.

*Poisoning or blocking single-atom sites experiments:* It is known that SCN<sup>-</sup> ions can poison M-N<sub>x</sub> active sites during catalysis of ORR. To consider the potential reaction between SCN<sup>-</sup> ions and KOH,

the ORR activity of Cu<sub>0.52</sub>Co<sub>0.48</sub>-N-C NSs was further measured in O<sub>2</sub>-saturated 0.1 M HClO<sub>4</sub> containing 0.01 M NaSCN, and compared with that examined in pure 0.1 M HClO<sub>4</sub> solution.

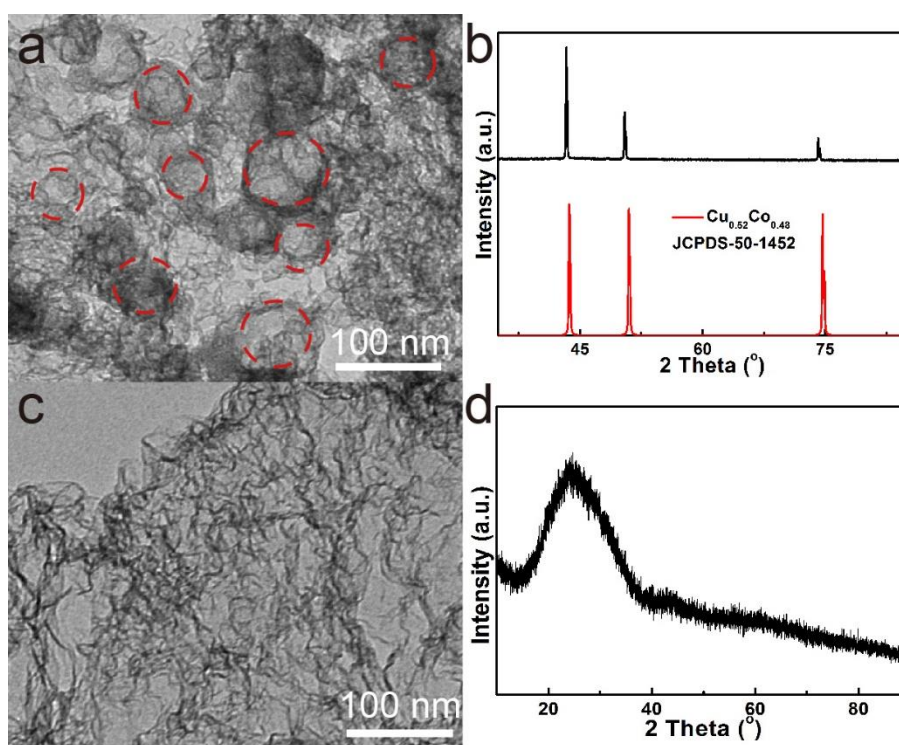

**Fig. S1** (a-b) TEM image and XRD pattern of the CuCo/Cu,Co-N-C intermediates. (c-d) TEM image and XRD pattern of the CuCo/Cu,Co-N-C intermediates after acid etching.

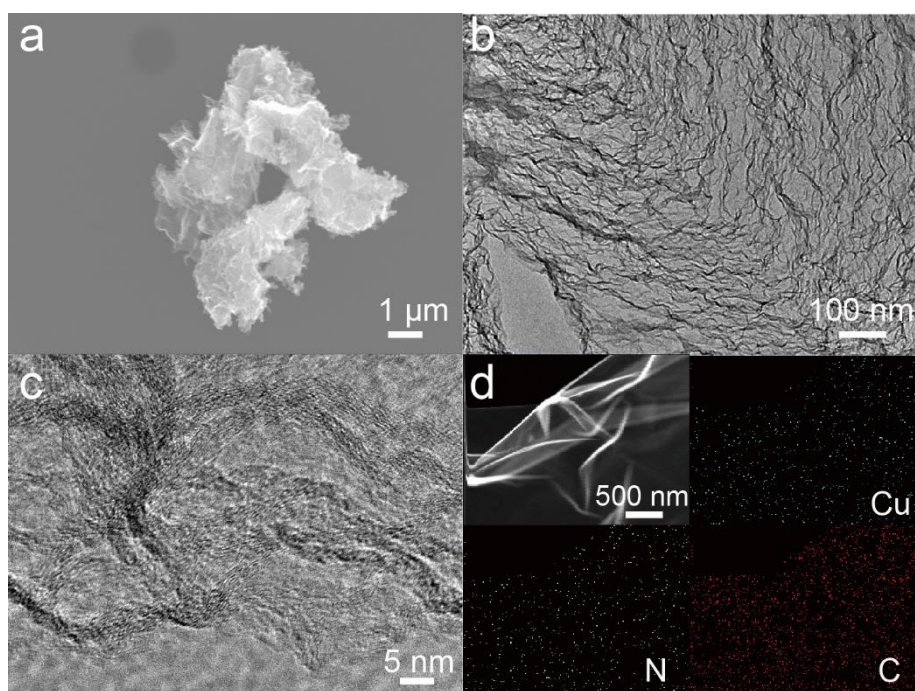

**Fig. S2** (a) FE-SEM image of Cu-N-C. (b-c) TEM and HRTEM images of Cu-N-C. (d) Corresponding low magnification HAADF-STEM image and elemental mapping analyses for Cu-N-C.

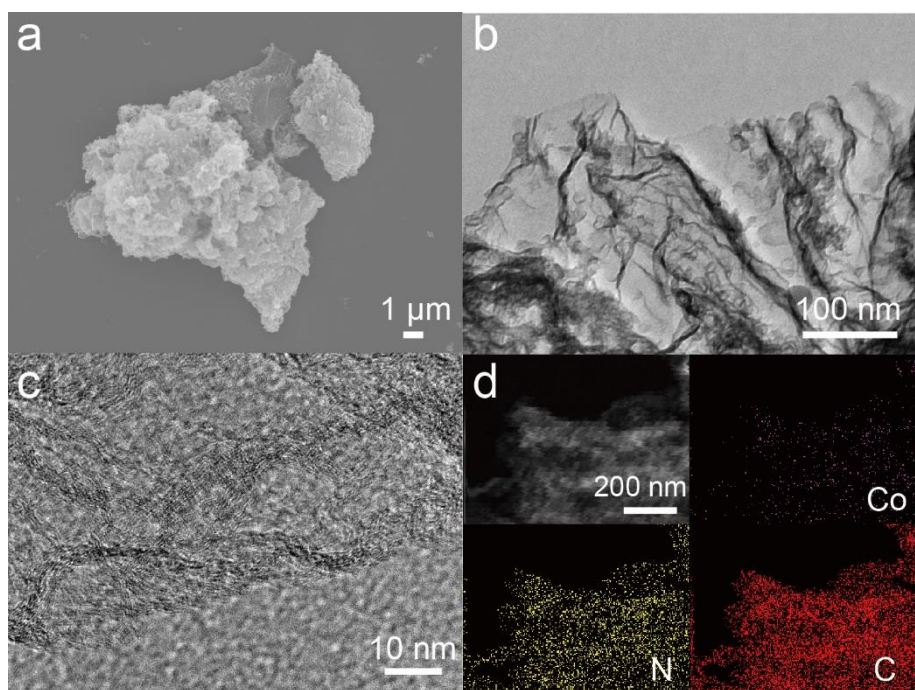

**Fig. S3** (a) FE-SEM image of Co-N-C. (b-c) TEM and HRTEM images of Co-N-C. (d) Corresponding low-magnification HAADF-STEM image and elemental mapping analyses for Co-N-C.

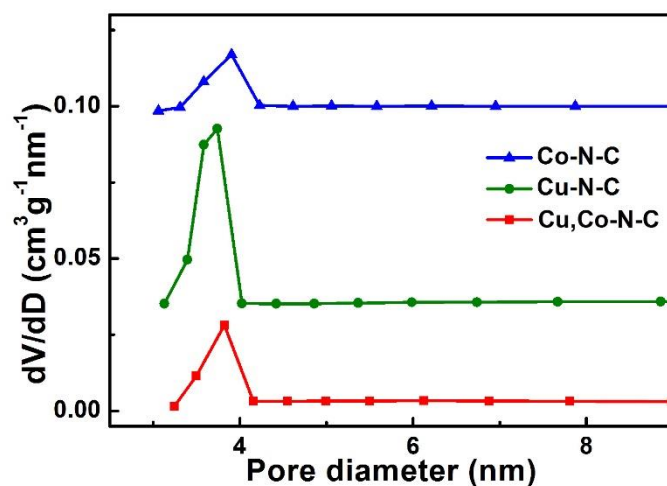

**Fig. S4** The pore-size distribution plots for Cu,Co-N-C NSs (red plot), Cu-N-C (green plot) and Co-N-C (blue plot) samples.

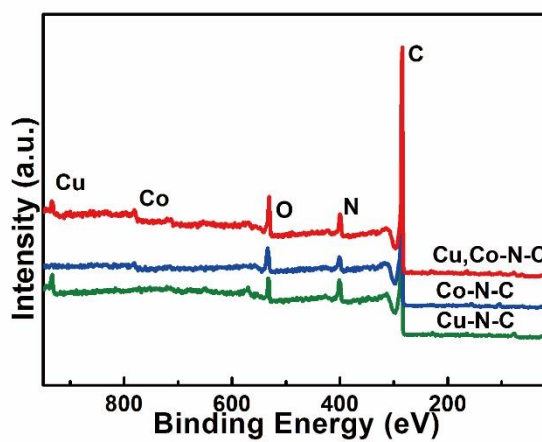

**Fig. S5** The survey XPS spectra for Cu,Co-N-C NSs (red plot), Cu-N-C (green plot) and Co-N-C (blue plot) samples.



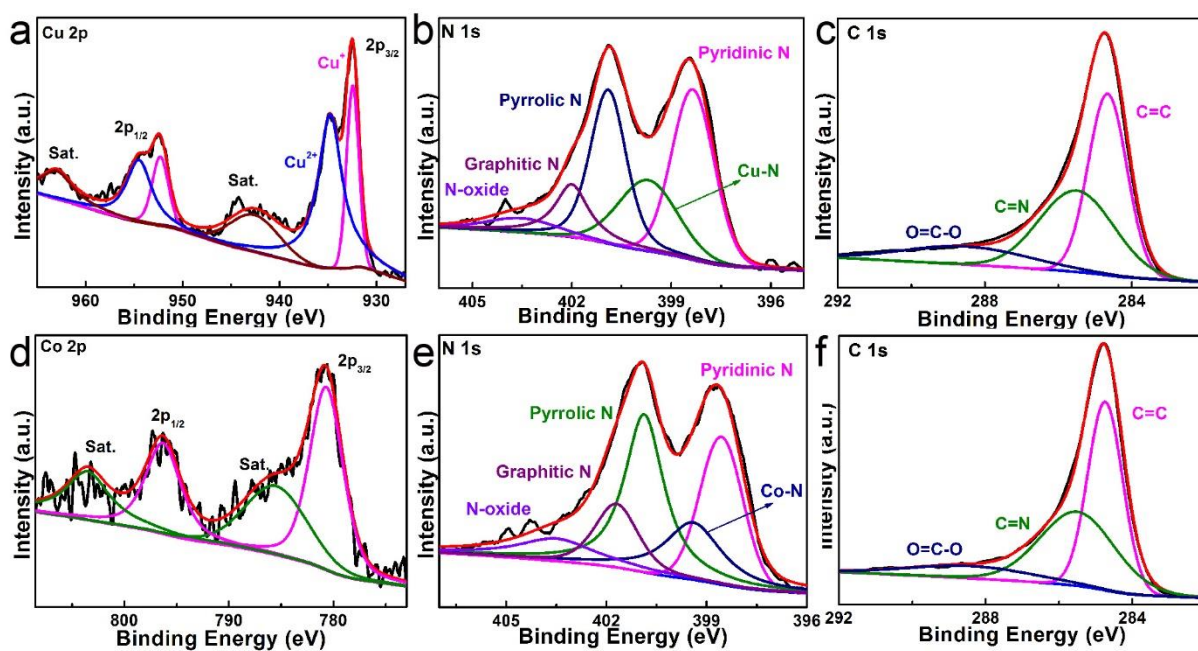

**Fig. S6** (a-c) Core-level XPS spectra for Cu 2p (a), N 1s (b), and C 1s (c) peaks of Cu-N-C NSs. (d-f) Core-level XPS spectra for Co 2p (d), N 1s (e), and C 1s (f) peaks of Co-N-C NSs.

**Table S1.** Comparing the content of various nitrogen species in Cu,Co-N-C NSs, Cu-N-C, and Co-N-C samples based on XPS data

| Sample    | Species percentage (%) |                      |            |             |            |
|-----------|------------------------|----------------------|------------|-------------|------------|
|           | Pyridinic N            | Metal-N <sub>x</sub> | Pyrrolic N | Graphitic N | Oxidized N |
| Cu,Co-N-C | 35.8                   | 19.4                 | 15.5       | 20.7        | 8.5        |
| Cu-N-C    | 33.6                   | 20.0                 | 29.2       | 12.0        | 5.2        |
| Co-N-C    | 24.6                   | 17.9                 | 34.4       | 12.8        | 10.3       |



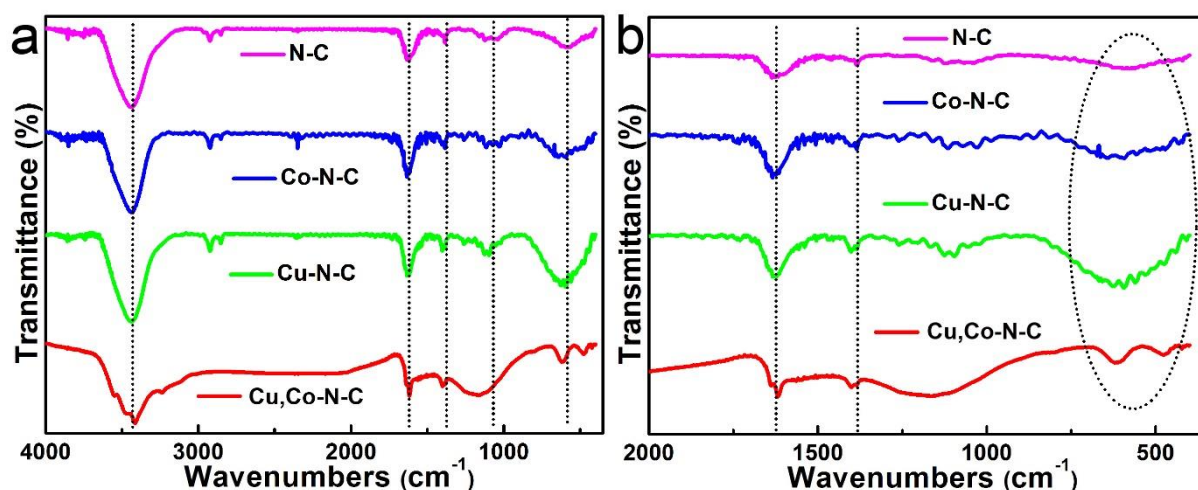

**Fig. S7** (a) FT-IR spectra for Cu,Co-N-C NSs, pure Cu-N-C, Co-N-C, and N-C samples at 4000 to 400  $\text{cm}^{-1}$ . (b) The magnified FT-IR spectra for Cu,Co-N-C NSs, pure Cu-N-C, Co-N-C, and N-C samples at 2000 to 400  $\text{cm}^{-1}$  region.

#### Discussion and Analysis of FT-IR spectra:

The above **Fig. S7** shows the FT-IR spectra for Cu,Co-N-C NSs, pure Cu-N-C, Co-N-C and N-C samples. As for pure N-C sample, it shows four main characteristic absorption bands at 3436  $\text{cm}^{-1}$ , 1622  $\text{cm}^{-1}$ , 1386  $\text{cm}^{-1}$ , and 581  $\text{cm}^{-1}$ , which can be assigned to the -NH stretching vibration, -C=C or -C=N stretching vibration from the skeleton of graphitized carbon structures, -C-N stretching vibration, and the in-plane bending or deformation vibration of N-containing heterocycles (*e.g.* pyrrolic ring), respectively (*The Infrared Spectra of Complex Molecules*, L. J. Bellamy, Ed., Chapman and Hall, Ltd. London, **1975**; *ACS Nano* **2019**, *13*, 3177). While for pure Cu-N-C and Co-N-C, the featured absorption bands for -C=C/-C=N stretching vibration, -C-N stretching vibration and N-heterocycles in-plane bending or deformation vibration, are shifted to high wavenumber direction about 10~18  $\text{cm}^{-1}$ , indicating that the Cu or Co has been incorporated into the N-C matrix, and bonded with the N to form Cu-N<sub>x</sub> or Co-N<sub>x</sub> coordination geometry. Usually, the absorption band at the low wavenumber region (400-1000  $\text{cm}^{-1}$ ) is served as the indicator for the formation of metal-N coordination (*J. Phys. Chem.* **1956**, *60*, 934). Both the Cu-N-C and Co-N-C only exhibit a broad absorption band centered at about 599  $\text{cm}^{-1}$ , implying that their metal-N coordination mode or environment may be similar. Whereas for Cu,Co-N-C sample, it shows two obvious absorption bands at 476 and 617  $\text{cm}^{-1}$  in the

low wavenumber region, implying that the introducing of Cu and Co bimetal will vary the metal-N coordination mode or environment, unlike their mono-metallic counterparts. The presence of those two peaks for metal-N coordination in Cu,Co-N-C NSs gives a hint that the following two kinds of metal-N coordination modes may exist in this sample: (1) the presence of isolated Cu-N<sub>x</sub> and Co-N<sub>x</sub> coordination centers; (2) the occurrence of “married” N<sub>x</sub>-Cu-Co-N<sub>x</sub> or (Cu,Co)-N<sub>x</sub> bimetallic coordination sites with the bonding between Cu and Co atomic centers, similar to previously reported (Fe,Co)/N-C dual site catalyst (*J. Am. Chem. Soc.* **2017**, 139, 10976). If the first case actually occurs in our Cu,Co-N-C sample, its Cu 2p and Co 2p fine XPS spectra should be identical to that of Cu-N-C and Co-N-C, respectively, and no charge transfer between Cu and Co could be observed. By carefully comparing the Cu 2p and Co 2p fine XPS spectra of Cu,Co-N-C with those of Cu-N-C and Co-N-C, the obvious charge transfer has been observed in Cu,Co-N-C sample (please see Fig. 4a and Fig. 4b). Thus, the first case can be excluded. And the most possible situation is that the Cu,Co-N-C sample mainly adopts the second metal-N coordination mode, *i.e.*, the formation of N<sub>x</sub>-Cu-Co-N<sub>x</sub> or (Cu,Co)-N<sub>x</sub> bimetallic sites.

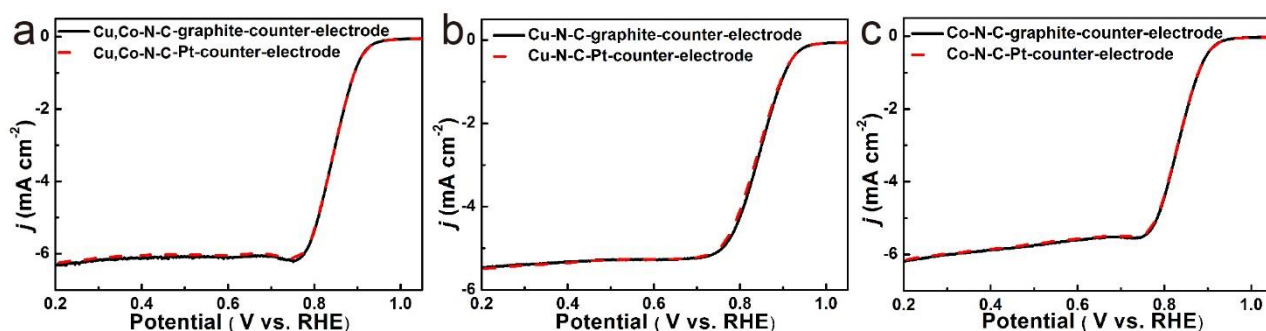

**Fig. S8** (a) Comparing the LSV curves of bimetal Cu,Co-N-C NSs catalyst that measured at 1600 rpm by using high-purity graphite rod and Pt foil as the counter-electrode, respectively. (b) Comparing the LSV curves of pure Cu-N-C control catalyst that measured at 1600 rpm by using high-purity graphite rod and Pt foil as the counter-electrode, respectively. (c) Comparing the LSV curves of pure Co-N-C control catalyst that measured at 1600 rpm by using high-purity graphite rod and Pt foil as the counter-electrode, respectively.

**Table S2.** Comparing the ORR performance parameters of Cu,Co-N-C NSs with other reported M-N-C catalysts (in 0.1 M KOH electrolyte)

| Catalyst                       | Doped element | Onset potential (V vs. RHE) | Half-wave potential (V vs. RHE) | References                                       |
|--------------------------------|---------------|-----------------------------|---------------------------------|--------------------------------------------------|
| Cu,Co-N-C NSs                  | Cu, Co, N     | 0.93                        | 0.85                            | This work                                        |
| Nano-P-ZIF-67                  | Co, N         | 1.01                        | 0.899                           | <i>J. Power Sources</i> 2017, 368, 46-56         |
| HNCSs                          | Zn, N         | 0.92                        | 0.82                            | <i>Carbon</i> 2019, 146, 248-256                 |
| Cu-N-C NDs                     | Cu, N         | 0.97                        | 0.85                            | <i>Small</i> 2019, 15, 1902410                   |
| Fe <sub>x</sub> N/NC-7         | Fe, N         | 0.98                        | 0.885                           | <i>Appl. Catal., B</i> 2020, 268, 118405         |
| Fe/Co-NCs                      | Fe, Co, N     | 0.963                       | 0.877                           | <i>Carbon</i> 2019, 146, 671-679                 |
| Fe-N-C                         | Fe, N         | 0.96                        | 0.83                            | <i>J. Power Sources</i> 2018, 375, 214-221       |
| Co@Co-N-C-A NHs                | Co, N         | 0.98                        | 0.85                            | <i>Appl. Catal., B</i> 2020, 260, 118207         |
| Co-N-C                         | Co, N         | 0.98                        | 0.889                           | <i>J. Power Sources</i> 2019, 418, 50-60         |
| Fe-SAs/Fe <sub>3</sub> C-Fe@NC | Fe, N         | 0.98                        | 0.927                           | <i>Small</i> 2020, 16,1906057                    |
| 3DOM Fe-N-C-900                | Fe, N         | 0.92                        | 0.875                           | <i>Nano Energy</i> 2020, 71, 104547              |
| Fe-N-C/MXene                   | Fe, N         | 0.92                        | 0.84                            | <i>ACS Nano</i> 2020, 14, 2436-2444              |
| Fe(0)@FeNC                     | Fe, N         | 0.946                       | 0.852                           | <i>Appl. Catal., B</i> 2019, 251, 240-246        |
| Fe-N-C SA/HCF                  | Fe, N         | 0.931                       | 0.802                           | <i>Small</i> 2020, 16, 1905920                   |
| Sc@NG                          | Sc, N         | 0.99                        | 0.89                            | <i>J. Power Sources</i> , 2019, 431, 265-273     |
| (Fe,Co)/CNT                    | Fe, Co, N     | 1.15                        | 0.954                           | <i>Energy Environ. Sci.</i> , 2018,11, 3375-3379 |

|                                       |              |       |       |                                          |
|---------------------------------------|--------------|-------|-------|------------------------------------------|
| 3D Co@N/C                             | Co, N        | 0.915 | 0.812 | <i>Carbon</i> 2019, 153, 575-584         |
| NC/Fe <sub>10-x</sub> Co <sub>x</sub> | Fe, Co,<br>N | 0.97  | 0.87  | <i>J. Alloys Compd.</i> 2017, 710, 57-65 |

[Notes]: The abbreviations of “NSs”, “ZIF”, “HNCSs”, “NDs”, “NHs”, “NC”, “3DOM”, “SA/HCF”, “NG” and “CNT” in the listed catalysts represent the “nanosheets”, “zeolite imidazole framework”, “hollow N-doped carbon microspheres”, “nanodisks”, “nanohybrids”, “nanoarchitectures”, “3D hierarchically ordered microporous-mesoporous-macroporous”, “single atoms in hyphae-derived carbon fibers”, “N-doped graphene” and “carbon nanotubes”, respectively. While for the symbol of “@”, it stands for the “core-shell nanostructures”.

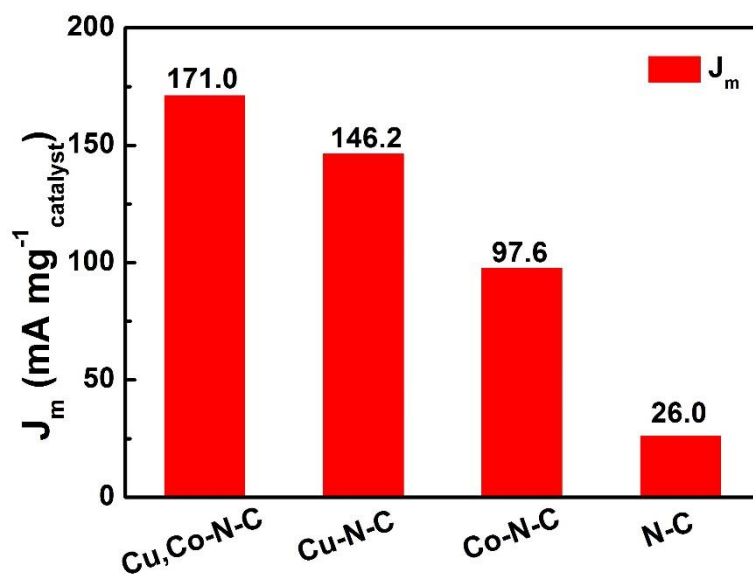

**Fig. S9** Comparing the mass activities ( $J_m$ ) of the typical Cu,Co-N-C NSs, pure Cu-N-C, pure Co-N-C and N-C catalysts at 0.80 V (vs. RHE).

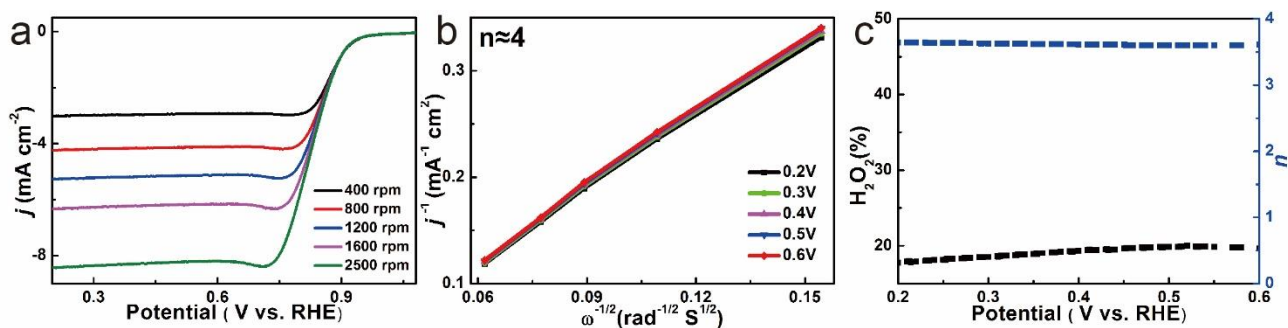

**Fig. S10** (a) ORR polarization curves of Cu,Co-N-C NSs that measured in 0.1 M KOH electrolyte at the electrode rotating rate ranging from 400 to 2500 rpm. (b) Corresponding K-L plots at various potentials. (c) The yield of peroxide species and the number of transferred electrons ( $n$ ) at different potentials for Cu,Co-N-C NSs that obtained by RRDE tests.

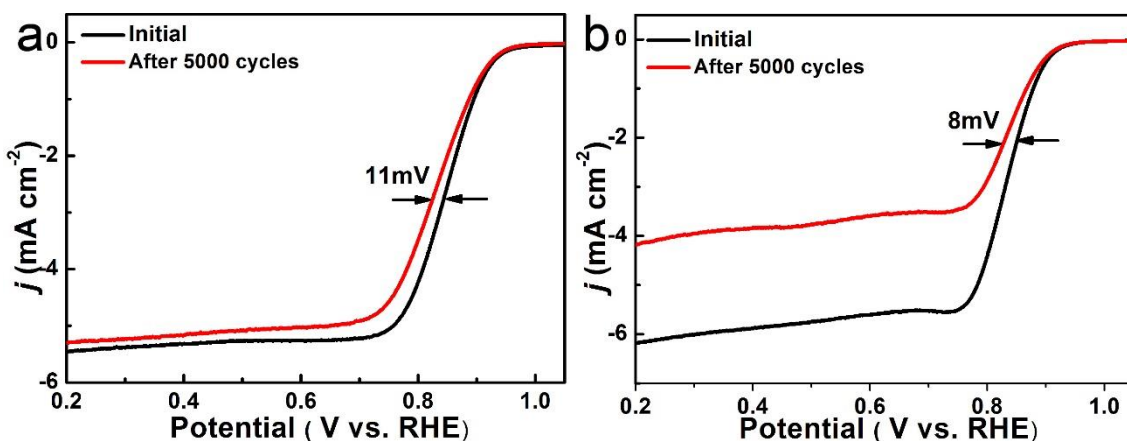

**Fig. S11** (a) Durability tests of Cu-N-C control catalyst in O<sub>2</sub>-saturated 0.1 M KOH for continuously working 5000 cycles (30h). (b) Durability tests of Co-N-C control catalyst in O<sub>2</sub>-saturated 0.1 M KOH for continuously working 5000 cycles (30h).

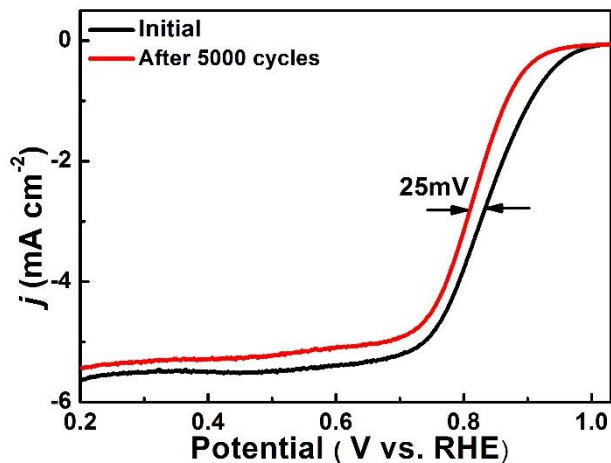

**Fig. S12** Durability test for commercial Pt/C (20%) catalyst in O<sub>2</sub>-saturated 0.1 M KOH electrolyte.



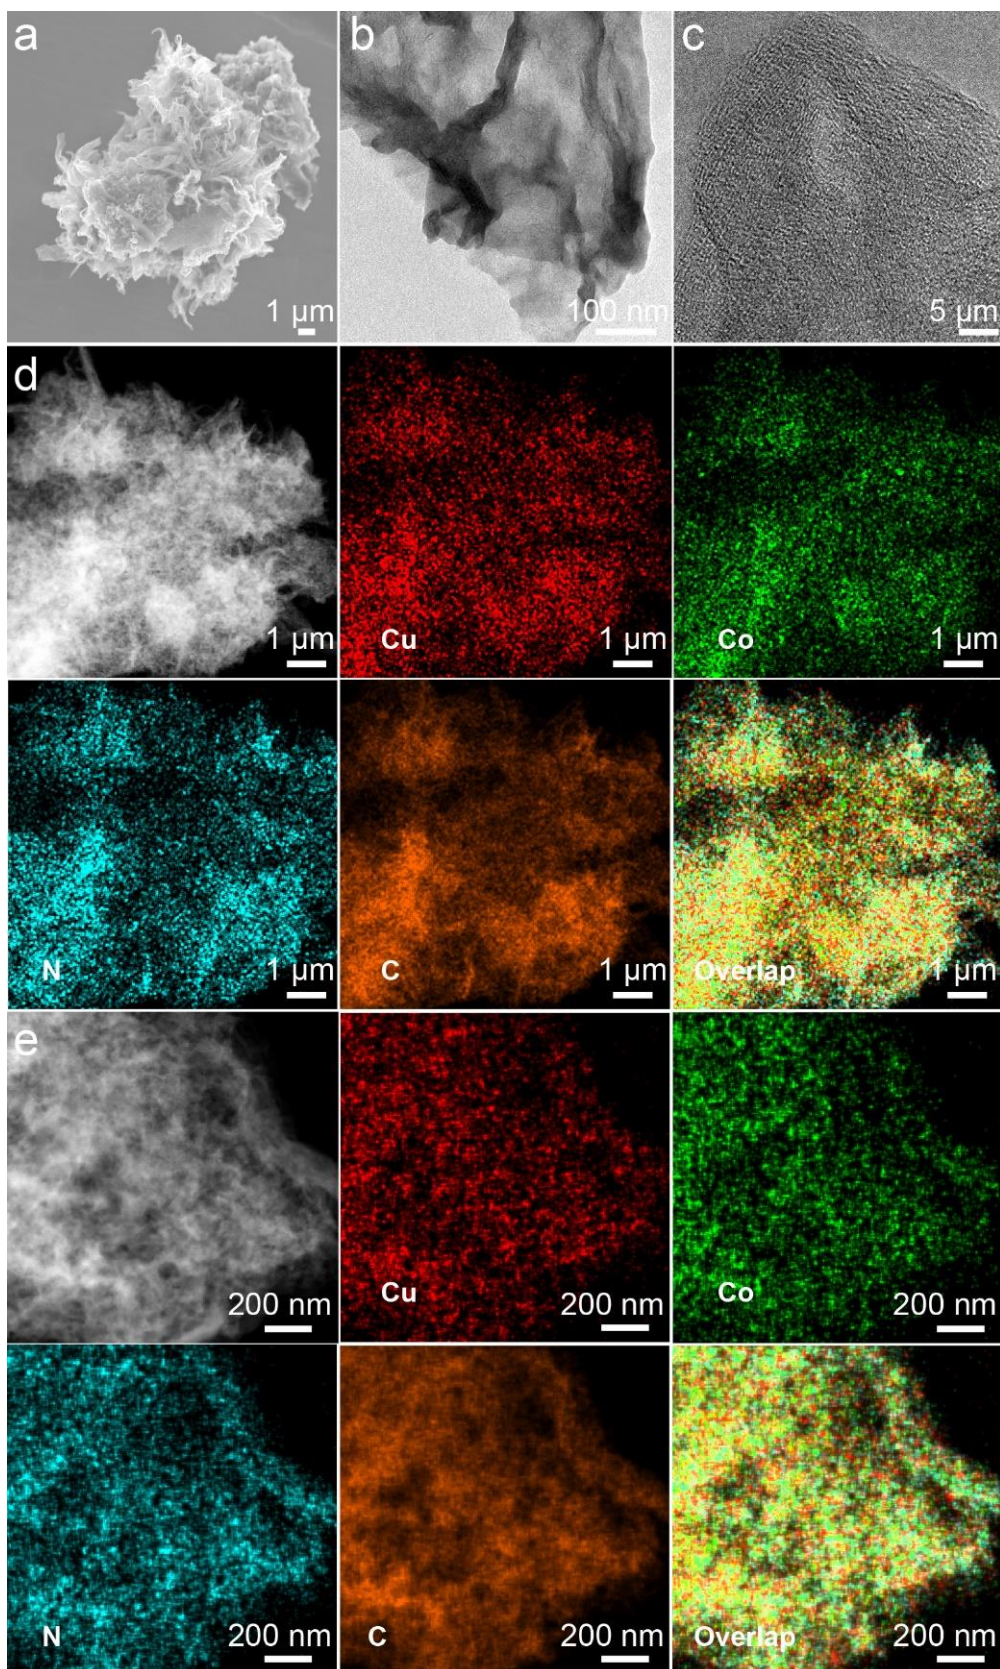

**Fig. S13** (a) FE-SEM image of Cu,Co-N-C NSs sample that collected after ORR tests for 5000 cycles. (b-c) The corresponding TEM (b) and HRTEM (c) images for Cu,Co-N-C NSs sample after ORR



cycling tests. (d) Low-magnification HAADF-STEM image and elemental mapping analyses for Cu,Co-N-C NSs sample after ORR cycling tests. (e) The related high-magnification HAADF-STEM image and elemental mapping analyses for Cu,Co-N-C NSs after ORR cycling tests.

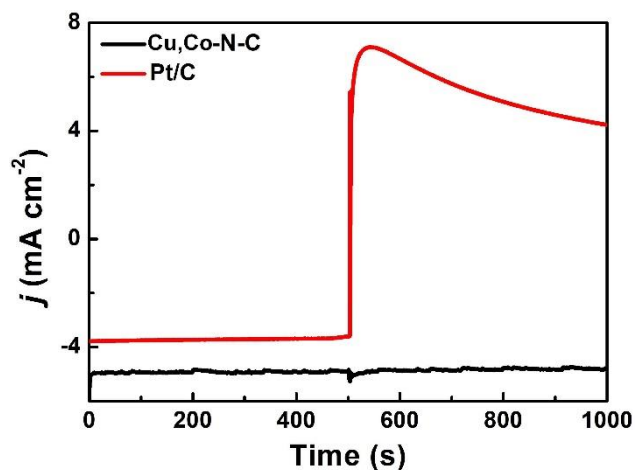

**Fig. S14** Chronoamperometric response of Cu,Co-N-C NSs and Pt/C catalyst at 0.30 V (*vs.* RHE) by adding 1M methanol into O<sub>2</sub>-saturated 0.1 M KOH electrolyte after 500 s.

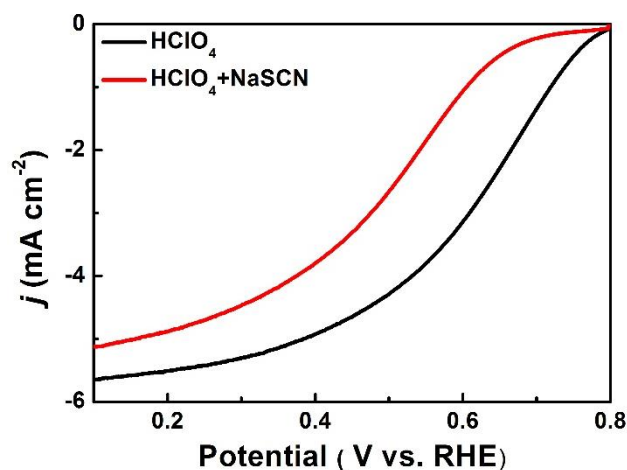

**Fig. S15** ORR polarization curves of Cu,Co-N-C NSs in O<sub>2</sub>-saturated 0.1 M HClO<sub>4</sub> electrolyte with or without adding 0.01 M NaSCN.
